# Supplementary material for: Quantum yield enhancement of firefly bioluminescence with biomolecular condensates
Source: Royal Society of Chemistry journal article supplement (doi:10.1039/d2cc04919h), 2022-01-01
Supplement: d2cc04919h1.pdf [file d2cc04919h1.pdf]

**Electronic Supplementary Information for  
Quantum Yield Enhancement of Firefly Bioluminescence  
with Biomolecular Condensates**

Ryo Nishihara<sup>‡\*a,b</sup>, Yoshiki Kihara<sup>‡a</sup>, Kazuki Niwa<sup>a</sup>, Masahiro Mimura<sup>a,c</sup>, Shunsuke Tomita<sup>\*a</sup>,  
Ryoji Kurita<sup>a,c</sup>

<sup>a</sup>National Institute of Advanced Industrial Science and Technology (AIST), 1-1-1 Higashi, Tsukuba, Ibaraki 305-8566, Japan. <sup>b</sup>Japan Science and Technology Agency (JST), PRESTO, 4-1-8, Honcho, Kawaguchi, Saitama 332-0012, Japan. <sup>c</sup>Faculty of Pure and Applied Sciences, University of Tsukuba, 1-1-1 Tennodai, Tsukuba, Ibaraki 305-8573, Japan. <sup>‡</sup>These authors contributed equally.

Ryo Nishihara, Shunsuke Tomita  
Email: r.nishihara@aist.go.jp (R.N.) and s.tomita@aist.go.jp (S.T.)

**Contents**

|                                 |     |
|---------------------------------|-----|
| 1. Experimental details         | S2  |
| 2. Supporting figures and table | S5  |
| 3. References                   | S13 |

## 1. Experimental details

### Materials

Adenosine 5'-triphosphate disodium salt hydrate (ATP) was obtained from Tokyo Chemical Industry Co., Ltd. (Tokyo, Japan). D-Luciferin, AkaLumine-HCl, 2-amino-2-methyl-1,3-propanediol, 3,3-dimethylglutaric acid, 2-amino-2-hydroxymethyl-1,3-propanediol, and magnesium chloride were obtained from Wako Pure Chemical Industries, Ltd. (Osaka, Japan). Luciferase from *Photinus pyralis* (firefly), seMpai, and polyethylene glycol (PEG, average mol wt 8000) were obtained from Sigma-Aldrich Co. (St. Louis, MO, USA). Poly-L-lysine hydrochloride (PLL; MW = 8200), poly-L-lysine hydrochloride (PLL; MW = 1600), and poly-L-arginine hydrochloride (PLL; MW = 9600) were obtained from Alamanda Polymers, Inc. (Huntsville, AL, USA). Dehydroluciferin was obtained from Biosynth Carbosynth, Ltd., (Newbury, United Kingdom). Alexa Fluor™ 680 C2 Maleimide was obtained from Thermo Fisher Scientific, Inc. (Waltham, MA, USA).

### Preparation of stock solutions

Stock solutions were prepared as follows: luciferase solution (30  $\mu$ M) in 50 mM GTA buffer (pH 7.4) with 10% glycerol; D-luciferin solution (25 mM) in DMSO; AkaLumine solution (25 mM) in DMSO; seMpai solution (50 mM) in MilliQ; dehydroluciferin solution (25 mM) in DMSO; ATP solution (100 mM) in 50 mM GTA buffer (pH 8); MgCl<sub>2</sub> solution (100 mM) in 50 mM GTA buffer (pH 8); peptide (PLR-50 mer or PLL-50 mer or PLL-10 mer) solution (100 mM) in 50 mM GTA buffer (pH 8); and FITC-PLL solution (25 mM) in 50 mM GTA buffer (pH 7.4). FITC-PLL was prepared according to the procedures described by Branchini et al.<sup>1</sup> The solutions were diluted to appropriate concentrations using 50 mM GTA buffer (pH 8). Protein concentration was determined by measuring the absorbance at 280 nm on a spectrophotometer (NanoDrop OneC; Thermo Fisher Scientific, Inc.).

### Bioluminescence intensities and turbidity

ATP, luciferase, D-luciferin, and peptide (PLR-50 mer, PLL-50 mer, or PLL-10 mer) were added into 384-well microplates (Greiner Bio-One, Kremsmünster, Germany) to prepare 40  $\mu$ L of the suspension (1.875 mM ATP, 5 nM luciferase, 0.0625–250  $\mu$ M D-luciferin or 0.0625–12.5  $\mu$ M D-luciferin analogues, 5.63 mM [monomer units] peptide, 50 mM GTA [pH 8 or pH 6.7]). After incubation at room temperature for 5–50 min, 10  $\mu$ L of 5 mM MgCl<sub>2</sub> solution was added into the suspension, and luminescence signals were immediately read for 104 s using a plate reader (Spark

Cyto; TECAN, Männedorf, Switzerland). The kinetic profiles ( $K_m$  and  $V_{max}$ ) were determined from the integrated values of the luminescence signals for 104 s and calculated by using GraphPad Prism9. Turbidity was determined using UV-vis absorption at 600 nm measured by the plate reader.

### **Bioluminescence intensities in the presence of dehydroluciferin**

To 40  $\mu$ L of the suspension (1.875 mM ATP, 5 nM luciferase, 0.0125–125  $\mu$ M dehydroluciferin, 125  $\mu$ M D-luciferin, 5.63 mM [monomer units] peptide, 50 mM GTA [pH 8]) in 384-well microplates (Greiner Bio-One), 10  $\mu$ L of 5 mM  $MgCl_2$  solution was added, and luminescence signals were immediately read for 104 s using a plate reader (Spark Cyto).

### **Bioluminescence spectra**

To 40  $\mu$ L of the suspension (1.875 mM ATP, 5 nM luciferase, 125  $\mu$ M D-luciferin, 5.63 mM [monomer units] peptide, 50 mM GTA [pH 8 or pH 6.7]) in PCR tubes, 10  $\mu$ L of 5 mM  $MgCl_2$  solution was added, and luminescence spectra were immediately read using LumiFL SpectroCapture (ATTO, Tokyo, Japan), with the following settings: measurement mode, single; measurement time, 180 s; slit width, 0.5 mm; camera gain, high; diffraction grating, 150 lines/mm; and shutter for measurement, automatic.

### **Fluorescence microscopic images**

Bright-field and fluorescence images of the 50  $\mu$ L suspension (1.5 mM ATP, 40 nM Alexa680 conjugated luciferase, 100  $\mu$ M D-luciferin, 4.5 mM [monomer units] peptide, 1 mM  $MgCl_2$ , 50 mM GTA [pH 8]) were captured using a plate reader (Spark Cyto), with green channel (excitation/emission: 461–487/500–530 nm) and far-red channel (excitation/emission: 626–644/661–800 nm). Alexa680 conjugated luciferase was prepared according to the reported procedures.<sup>1</sup> As for fluorescence images with dehydroluciferin, AkaLumine, and seMpai, the green channel was used.

### **Bioluminescence microscopic images**

To 40  $\mu$ L of the suspension (1.875 mM ATP, 50 nM luciferase, 125  $\mu$ M D-luciferin, 5.63 mM [monomer units] PLR-50, 50 mM GTA [pH 8]), 10  $\mu$ L of 5 mM  $MgCl_2$  solution was added, and bright-field and bioluminescence images were captured using a IXplore Live for Luminescence (Olympus, Japan). The exposure time for bioluminescence images is 5 min.

**Bioluminescence quantum yields**

A custom-built luminometer with a photomultiplier tube (H11890-01; Hamamatsu Photonics, Shizuoka, Japan) was calibrated according to the protocol established by us and used to detect bioluminescence signals in photon.<sup>2</sup> The L-L reaction was initiated by the addition of 5 mM MgCl<sub>2</sub> solution (10 μL) into the mixture solution (1.875 mM ATP, 500 nM luciferase, 0.025 μM D-luciferin, 0 μM or 5.63 μM [monomer units] peptide, 50 mM GTA [pH 8]) in 5 mL polypropylene tube (Corning, One Riverfront Plaza, NY, USA). The bioluminescence signals were monitored until the L-L reaction was completed.

## 2. Supporting figures and table

### Coacervates that consisted of a peptide and ATP

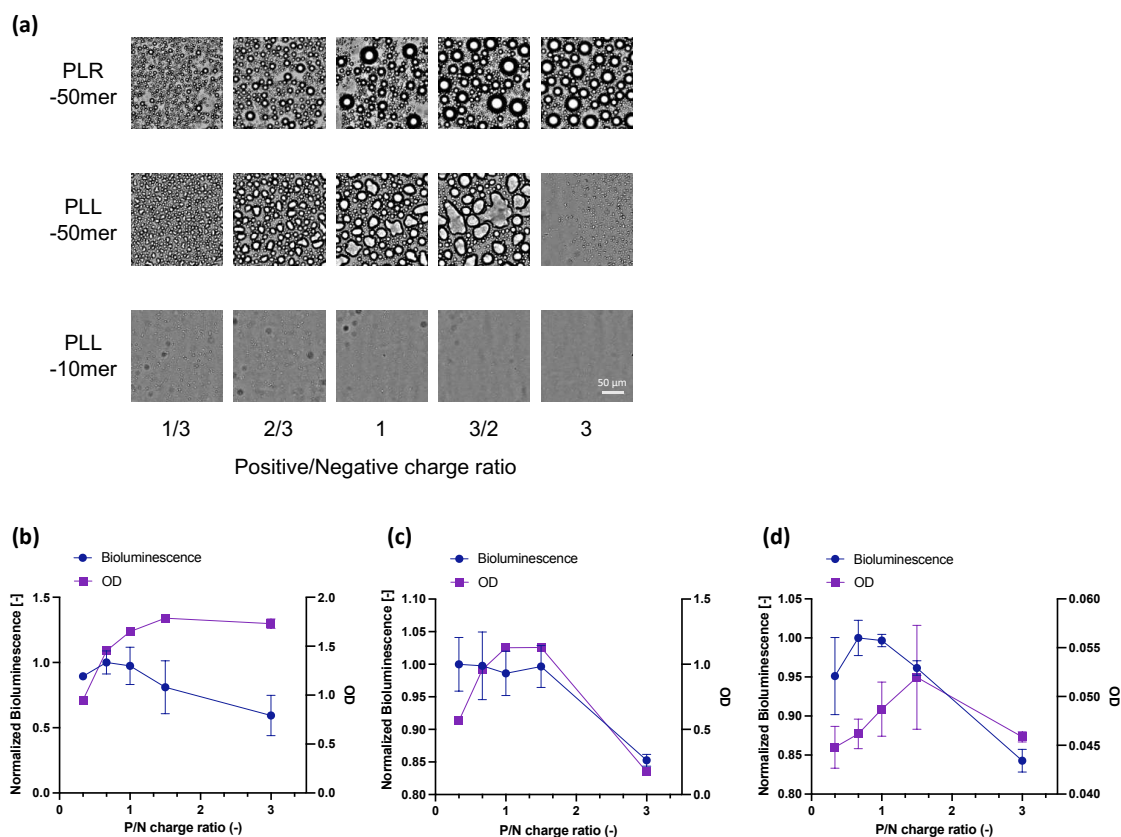

**Fig. S1** (a) Microscopic images of coacervates that consisted of oppositely charged peptide (1.5–13.5 mM) and ATP (1.5 mM): 50  $\mu\text{m}$ . Positive/negative charge ratio indicates the charge ratio of the peptide to ATP. Relative bioluminescence intensities and turbidities in the presence of coacervates that consisted of (b) 50-mer PLR (1.5–13.5 mM) and ATP (1.5 mM), (c) 50-mer PLL (1.5–13.5 mM) and ATP (1.5 mM), and (d) 10-mer PLL (1.5–13.5 mM) and ATP (1.5 mM). The bioluminescence intensities were measured using 100  $\mu\text{M}$  D-luciferin.

### Time course of PLR/ATP coacervate generation

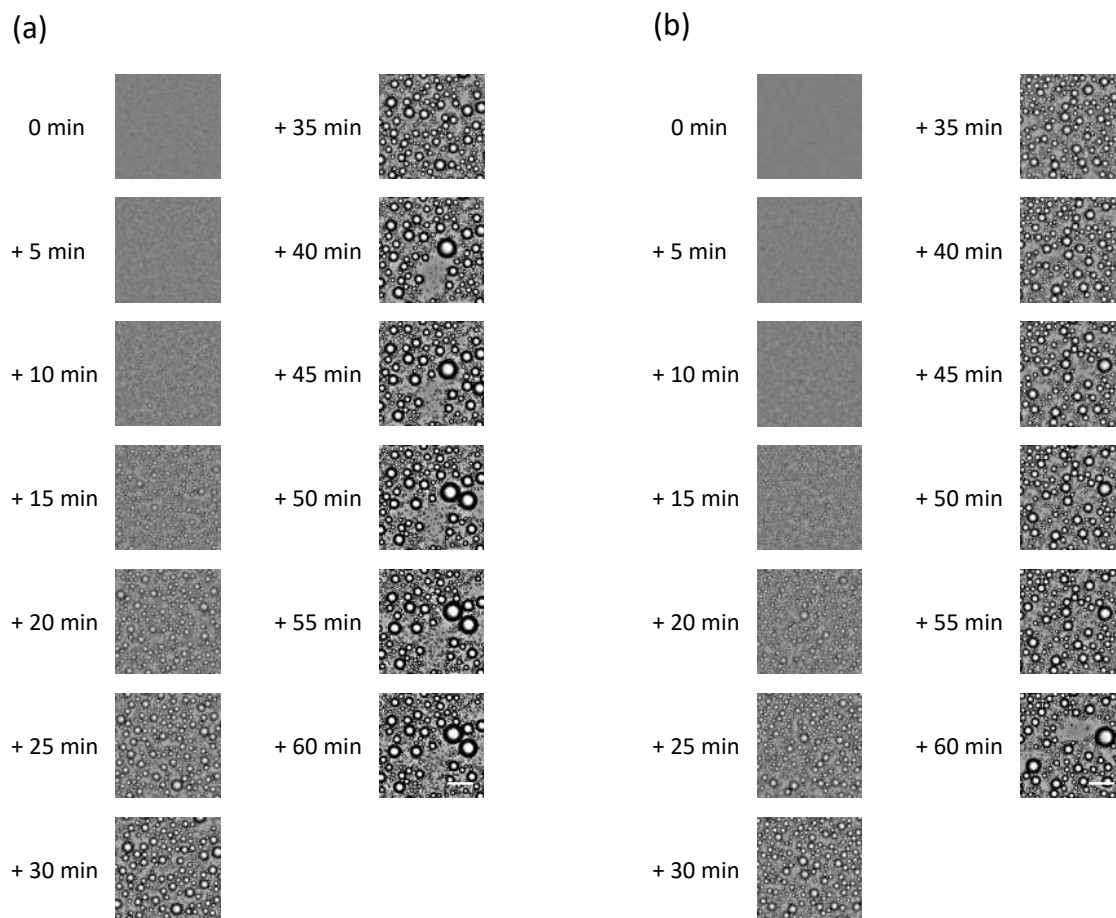

**Fig. S2** Time course of PLR/ATP coacervate formation (a) with 1.0 mM MgCl<sub>2</sub> and (b) without 1.0 mM MgCl<sub>2</sub>. The solution contained 4.5 mM PLR (50 mer), 1.5 mM ATP, 4 nM FLuc, and 100 μM D-luciferin in 50 mM GTA buffer (pH 8); scale bar: 50 μm.

### Bioluminescence microscopic images

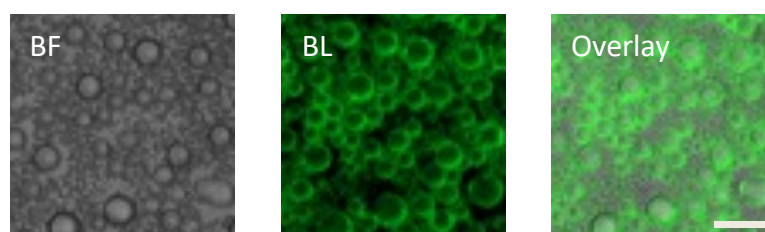

**Fig. S3** Bioluminescence images of 50-mer PLR/ATP coacervate systems; scale bar: 50 μm.

## Firefly bioluminescence in the presence of PEG

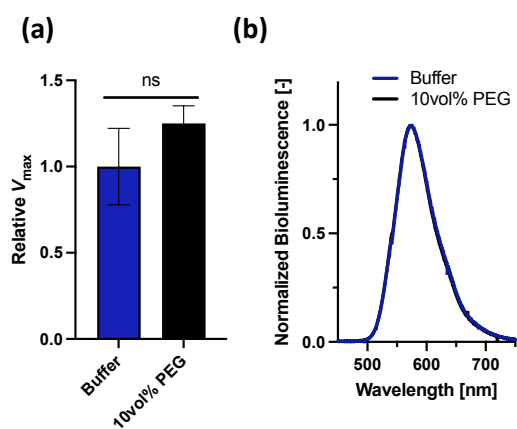

**Fig. S4** (a) Relative  $V_{max}$  was calculated by normalizing the  $V_{max}$  value of each luciferin in GTA buffer (50 mM, pH 8) to 1.0. (b) Bioluminescence spectra in the presence or absence of PEG.

### Time course of PLL/ATP coacervate generation

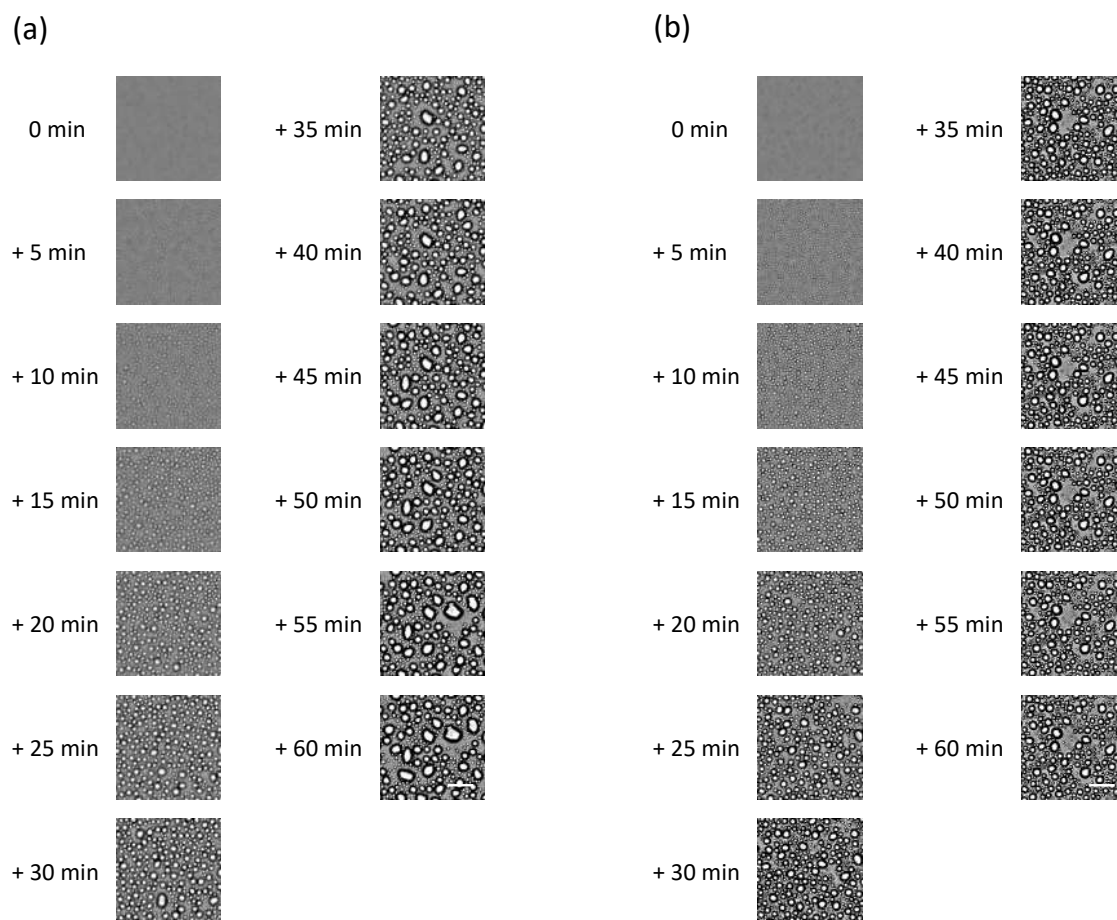

**Fig. S5** Time course of PLL-50-mer/ATP coacervate formation (a) with 1.0 mM MgCl<sub>2</sub> and (b) without 1.0 mM MgCl<sub>2</sub>. The solution contained 4.5 mM PLL (50-mer), 1.5 mM ATP, 4 nM FLuc, and 100  $\mu$ M D-luciferin in 50 mM GTA buffer (pH 8); scale bar: 50  $\mu$ m.



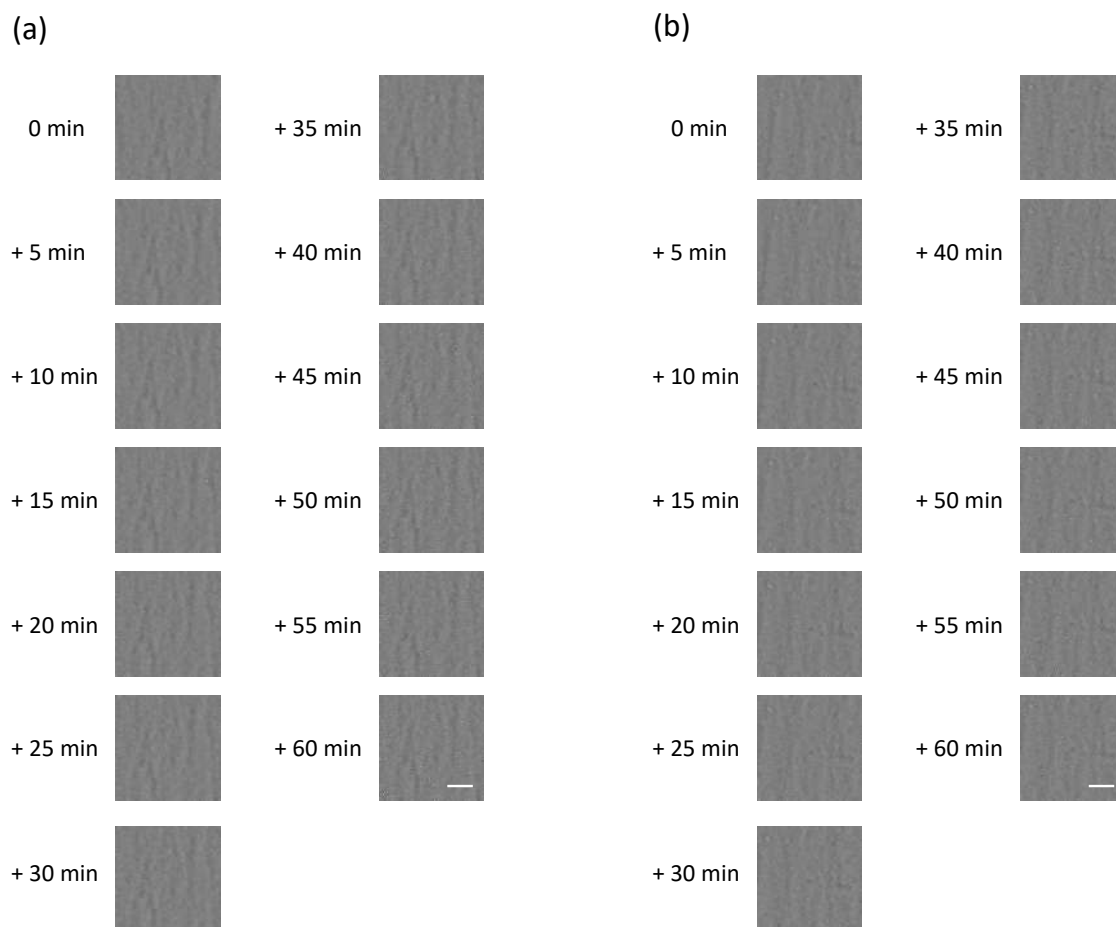

**Fig. S6** Time course of PLL-10-mer/ATP coacervate formation (a) with 1.0 mM MgCl<sub>2</sub> and (b) without 1.0 mM MgCl<sub>2</sub>. The solution contained 4.5 mM PLL (10-mer), 1.5 mM ATP, 4 nM FLuc, and 100 μM D-luciferin in 50 mM GTA buffer (pH 8); scale bar: 50 μm.

## Firefly bioluminescence at acidic pH

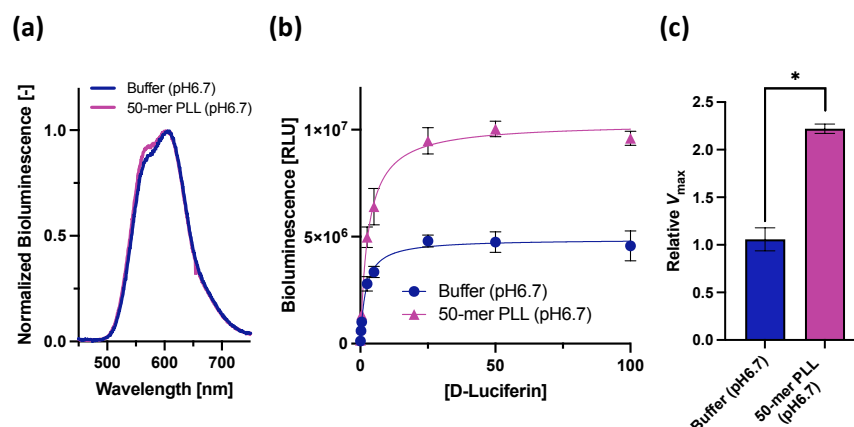

**Fig. S7** (a) BL spectra in the presence or absence of 50-mer PLL at pH 6.7. (b) Dose-dependent BL intensities in the presence or absence of 50-mer PLL at pH 6.7. Data were fitted into the Michaelis–Menten equation in GraphPad Prism9. Error bars represent the standard deviation of three measurements. (c) The relative  $V_{\max}$  was calculated by normalizing the  $V_{\max}$  value of each substrate in GTA buffer (50 mM, pH 6.7) to 1.0. \* $P < 0.04$  ( $t$ -test).

## Firefly bioluminescence in the presence of CoA

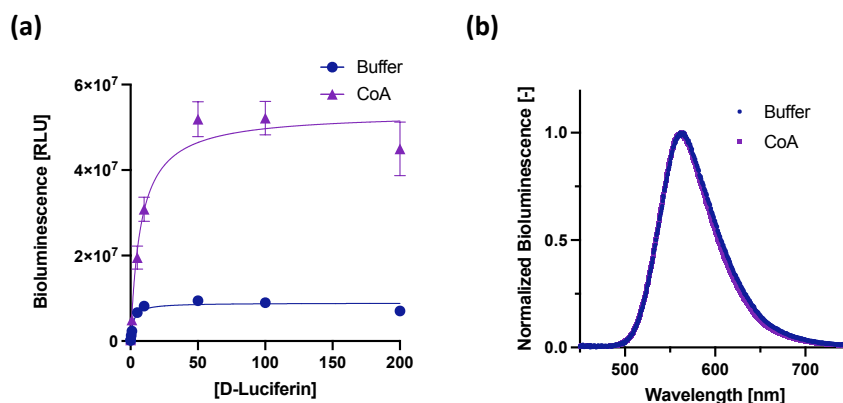

**Fig. S8** (a) Dose-dependent bioluminescence intensities: 0.05–200  $\mu\text{M}$  luciferin in the presence of 1.5 mM ATP, 4 nM luciferase, 1 mM  $\text{MgCl}_2$ , and 100  $\mu\text{M}$  CoA, or in the absence of CoA. Data were fit into the Michaelis–Menten equation in GraphPad Prism9. Error bars represent the standard deviation of three measurements. (b) Bioluminescence spectra in the presence or absence of CoA.

## Fluorescence microscopic images with dehydroluciferin

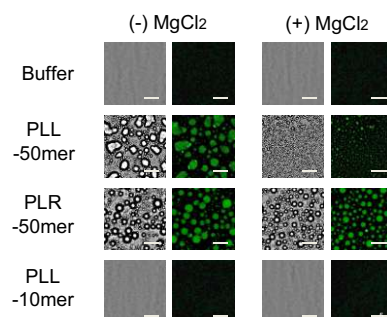

**Fig. S9** Fluorescence images of 10  $\mu\text{M}$  dehydroluciferin in the presence of droplets; excitation/emission: 461–487/500–530 nm, scale bar: 50  $\mu\text{m}$ .

## Bioluminescence of D-luciferin analogues

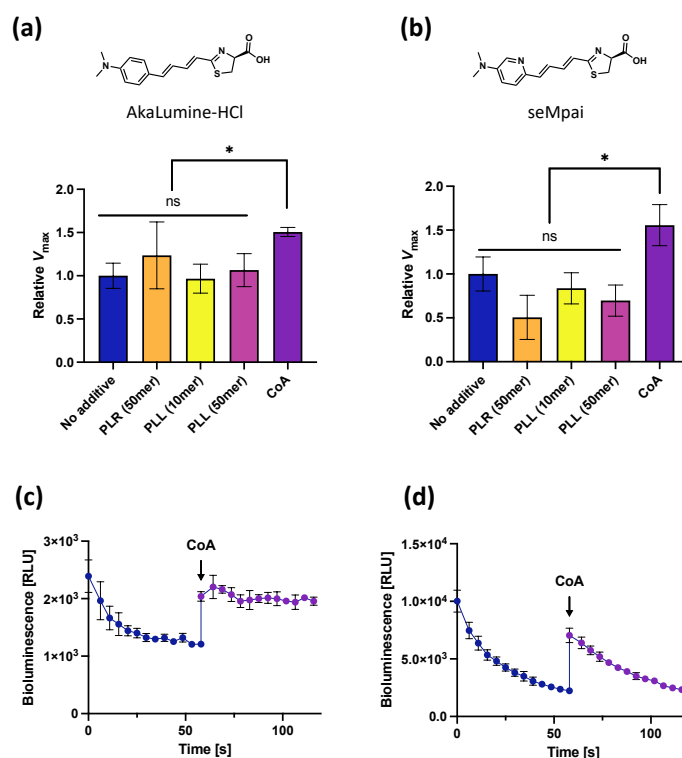

**Fig. S10** (a) Chemical structure of AkaLumine-HCl and its relative  $V_{\text{max}}$ . (b) Chemical structure of seMpai and its relative  $V_{\text{max}}$ . \* $P < 0.04$  ( $t$ -test). ns, not significant. Effect of the addition of CoA (100  $\mu\text{M}$ ) during the bioluminescence reaction. Injection of CoA enhanced the bioluminescence after the initial burst of light emission with (c) AkaLumine and (d) seMpai. A secondary emission peak was observed possibly due to the conversion of L-AMP into L-CoA for these analogues. Error bars represent the standard deviation of three measurements.

## Fluorescence microscopic images with D-luciferin analogues

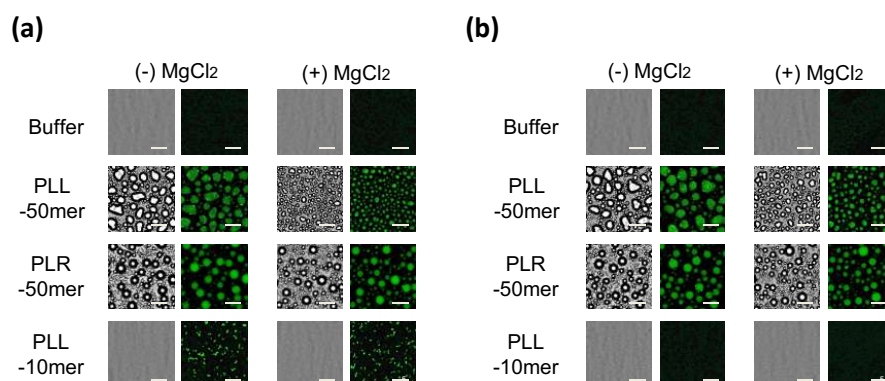

**Fig. S11** Fluorescence images of 10  $\mu\text{M}$  D-luciferin analogue (a: AkaLumine-HCl, b: seMpai) in the presence of droplets; excitation/emission: 461–487/500–530 nm, scale bar: 50  $\mu\text{m}$ .

## Kinetic profiles of firefly bioluminescence

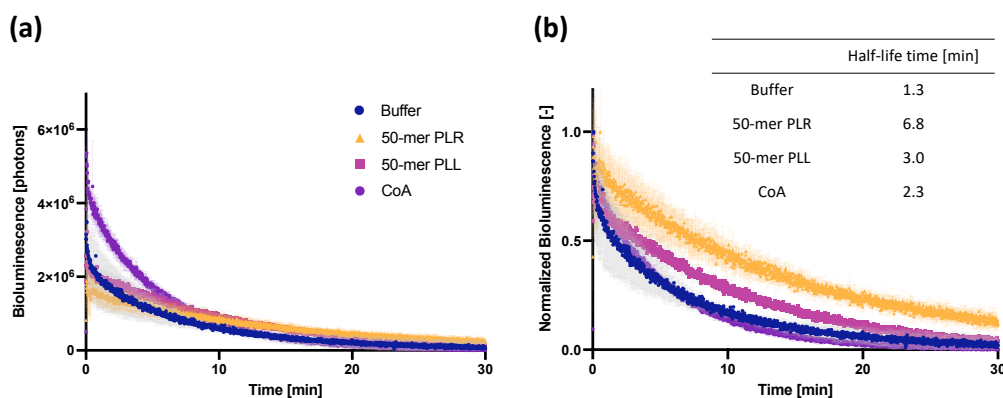

**Fig. S12** The light emission time profiles of firefly bioluminescence. The time-course data shown in (b) are normalized by the bioluminescence values at 0 min in (a). The coacervate system and CoA system exhibited a more prolonged and less flash-type emission than that of the buffer system due to a reduced affinity of inhibitors to the enzyme.

## Bioluminescence quantum yield under molecular crowding conditions

Table S1. Firefly bioluminescence quantum yield in the presence of PEG

| Non-luminescence cofactor added | $\varphi_{BL}$ | $\pm \sigma^*$ |
|---------------------------------|----------------|----------------|
| <b>+ 10% PEG</b>                | 0.34           | 0.046          |

\*Standard deviation of the  $\varphi_{BL}$  measurement.

### 3. References

1. B. Branchini, D. Ablamsky and J. Rosenberg, *Bioconjugate Chem.*, 2010, **21**, 2023-2030.
2. Y. Ikeda, M. Tanaka, R. Nishihara, Y. Hiruta, D. Citterio, K. Suzuki and K. Niwa, *J. Photochem. Photobiol. A Chem.*, 2020, **394**, 112459.
